# Supplementary material
Source: PubMed Central journal article supplement (PMC4547110)
Supplement: DS_10.1177_1941738114568775.pdf [file DS_10.1177_1941738114568775.pdf]

## Appendix 1: Physical Therapy for Patellar Tendinopathy

| Authors                             | Type of Study                | Treatment (by group)                                                                                         | Number of Subjects (total/study group) | Results                                                                                                                                | Authors' Conclusion                                                                                                                                                                                                  | Grade of recommendation |
|-------------------------------------|------------------------------|--------------------------------------------------------------------------------------------------------------|----------------------------------------|----------------------------------------------------------------------------------------------------------------------------------------|----------------------------------------------------------------------------------------------------------------------------------------------------------------------------------------------------------------------|-------------------------|
| Jonsson and Alfredson <sup>37</sup> | Prospective randomized trial | 1. Painful eccentric exercise program<br>2. Painful concentric exercise program (both done on decline board) | 15 (19 tendons/10 tendons)             | At 12-week follow-up, VAS was significantly improved in the eccentric exercise group                                                   | Eccentric exercise training on a decline board seems to reduce pain in jumper's knee                                                                                                                                 | B                       |
| Young et al <sup>91</sup>           | RCT                          | 1. Traditional eccentric exercise protocol<br>2. Eccentric exercise protocol with decline board              | 17/8                                   | At 12 weeks and 12 months, both groups improved. At 12 months, the decline group had a higher likelihood of an increase in VISA scores | Both exercise protocols improved pain and sporting function in volleyball players over 12 months. This study indicates that the decline squat protocol offers greater clinical gains during a rehabilitation program | A                       |
| Bahr et al <sup>6</sup>             | RCT                          | 1. Primary surgery<br>2. Eccentric training on a decline board                                               | 35 (40 tendons/20 tendons)             | At 12 months, both groups improved in VISA score; however, there was no significant difference between groups                          | No advantage was demonstrated for surgical treatment compared with eccentric strength training. Eccentric training should be tried for 12 weeks before surgery                                                       | A                       |

| Authors                    | Type of Study | Treatment (by group)                                                                             | Number of Subjects (total/study group) | Results                                                   | Authors' Conclusion                                                                                                                                                                            | Grade of recommendation |
|----------------------------|---------------|--------------------------------------------------------------------------------------------------|----------------------------------------|-----------------------------------------------------------|------------------------------------------------------------------------------------------------------------------------------------------------------------------------------------------------|-------------------------|
| Visnes et al <sup>84</sup> | RCT           | 1. Eccentric training protocol with decline board<br>2. No extra training                        | 29/13                                  | At 12 weeks, no statistical difference between the groups | There was no effect on knee function from a 12-week program with eccentric training among a group of volleyball players with PT who continued to train and compete during the treatment period | A                       |
| Frohm et al <sup>26</sup>  | RCT           | 1. Bilateral eccentric squat training program<br>2. Eccentric training protocol on decline board | 20/10                                  | At 12 weeks, no statistical difference between groups     | In patients with PT, two-legged eccentric overload training was as safe as the present standard daily eccentric 1-legged rehabilitation training regimen using a decline board                 | A                       |

PT, patellar tendinopathy; RCT, randomized controlled trial; VAS, visual analog scale; VISA, Victorian Institute of Sport Assessment.

Appendix 2. Summary of Surgical Studies for Patellar Tendinopathy

| Authors                               | Type of Study        | Treatment                                                                         | Number of Subjects (total/study group) | Results                                                                                     | Authors' Conclusion                                                                                                                                                 | Grade of recommendations |
|---------------------------------------|----------------------|-----------------------------------------------------------------------------------|----------------------------------------|---------------------------------------------------------------------------------------------|---------------------------------------------------------------------------------------------------------------------------------------------------------------------|--------------------------|
| Popp et al <sup>65</sup>              | Retrospective review | Open debridement of affected tissue                                               | 11                                     | At average 2.1 years: 7 excellent, 3 good, 1 poor                                           | In select patients, excellent results can be achieved with surgical treatment                                                                                       | D                        |
| Griffiths and Selesnick <sup>31</sup> | Retrospective review | Open debridement of affected tissue                                               | 7                                      | At average 4.2 years: 6 excellent, 1 fair                                                   | Recommend surgical intervention in patients who fail conservative treatment                                                                                         | D                        |
| Ferretti et al <sup>18</sup>          | Retrospective review | Open debridement of affected tissue/drilling inferior pole of patella             | 33                                     | At average 8 years: 23 excellent, 5 good, 1 fair, 4 poor                                    | The outcome of surgery is satisfactory but less predictable in volleyball players                                                                                   | D                        |
| Shelbourne et al <sup>77</sup>        | Case series          | Open debridement of affected tissue with multiple longitudinal cuts in the tendon | 22                                     | At average of 8.1 months, 14/16 patients returned to same sport at prior level of intensity | Surgical debridement and tendon stimulation along with aggressive rehabilitation was found to be effective in returning athletes back to their level of competition | D                        |

| Authors                        | Type of Study        | Treatment                                                                       | Number of Subjects (total/study group) | Results                                                                                                                  | Authors' Conclusion                                                                                                                      | Grade of recommendations |
|--------------------------------|----------------------|---------------------------------------------------------------------------------|----------------------------------------|--------------------------------------------------------------------------------------------------------------------------|------------------------------------------------------------------------------------------------------------------------------------------|--------------------------|
| Lorbach et al <sup>49</sup>    | Case series          | Arthroscopic resection of inferior pole of patella                              | 20                                     | At 2 years: 18/20 excellent to good                                                                                      | Arthroscopic resection of the inferior pole of the patella produces satisfactory clinical results in function and pain reduction         | D                        |
| Pascarella et al <sup>62</sup> | Case series          | Arthroscopic debridement of affected tissue and inferior pole patella resection | 73/27 athletes                         | At 1 and 3 years, IKDC, Lysholm and VISA-P scores improved significantly; 19 athletes returned to previous level of play | Arthroscopic surgery for PT in cases refractory to nonoperative management provides significant improvement maintained at least 3 years. | D                        |
| Santander et al <sup>73</sup>  | Retrospective review | Arthroscopic debridement of affected tissue                                     | 23                                     | At average 58 months, 19/23 returned to previous level of play                                                           | Arthroscopic surgery is comparable to open techniques and a high percentage of athletes returned to their previous activity level.       | D                        |

| Authors                   | Type of Study | Treatment                                        | Number of Subjects (total/study group) | Results                                                                                                    | Authors' Conclusion                                                                                                                            | Grade of recommendations |
|---------------------------|---------------|--------------------------------------------------|----------------------------------------|------------------------------------------------------------------------------------------------------------|------------------------------------------------------------------------------------------------------------------------------------------------|--------------------------|
| Maier et al <sup>53</sup> | Case series   | Arthroscopic debridement of synovium and fat pad | 30                                     | At average of 4.4 years, all pain and functional scores improved; 23/30 returned to previous level of play | Arthroscopic debridement of the synovium and fat pad produced excellent to good results in a majority of cases in patients with refractory PT. | D                        |

IKDC, International Knee Documentation Committee; PT, patellar tendinopathy; VISA, Victorian Institute of Sport Assessment.
